# Supplementary material for: Seven ferroptosis-specific expressed genes are considered as potential biomarkers for the diagnosis and treatment of cigarette smoke-induced chronic obstructive pulmonary disease
Source: PubMed Central journal article supplement — Ann Transl Med. 2022 Mar;10(6):331. doi: 10.21037/atm-22-1009 (PMC9011264; doi:10.21037/atm-22-1009), 2022-03
Supplement: atm-10-06-331-supplementary.pdf [file atm-10-06-331-supplementary.pdf]

**Supplementary**

**Table S1** Commonly differentially expressed among GSE10006, GSE11784 AND GSE20257

| Commonly differentially expressed among GSE10006, GSE11784 AND GSE20257 |             |
|-------------------------------------------------------------------------|-------------|
| Gene.Symbol                                                             | Up/Down     |
| <i>CYP1B1</i>                                                           | Upregulated |
| <i>CYP1A1</i>                                                           | Upregulated |
| <i>AKR1B10</i>                                                          | Upregulated |
| <i>UCHL1</i>                                                            | Upregulated |
| <i>GAD1</i>                                                             | Upregulated |
| <i>CEACAM5</i>                                                          | Upregulated |
| <i>SPP1</i>                                                             | Upregulated |
| <i>MUCL1</i>                                                            | Upregulated |
| <i>GPX2</i>                                                             | Upregulated |
| <i>LOC284825</i>                                                        | Upregulated |
| <i>SPRR3</i>                                                            | Upregulated |
| <i>TPRXL</i>                                                            | Upregulated |
| <i>CCL2</i>                                                             | Upregulated |
| <i>SLC7A11</i>                                                          | Upregulated |
| <i>CXCL14</i>                                                           | Upregulated |
| <i>ALDH3A1</i>                                                          | Upregulated |
| <i>CABYR</i>                                                            | Upregulated |
| <i>SFRP2</i>                                                            | Upregulated |
| <i>ST3GAL4-AS1</i>                                                      | Upregulated |
| <i>ADH7</i>                                                             | Upregulated |
| <i>HOTS</i>                                                             | Upregulated |
| <i>TCN1</i>                                                             | Upregulated |
| <i>CLEC5A</i>                                                           | Upregulated |
| <i>B3GNT6</i>                                                           | Upregulated |
| <i>JAKMIP3</i>                                                          | Upregulated |
| <i>MUC12</i>                                                            | Upregulated |
| <i>DTNA</i>                                                             | Upregulated |
| <i>KRT6A</i>                                                            | Upregulated |
| <i>MEP1A</i>                                                            | Upregulated |
| <i>AHRR</i>                                                             | Upregulated |
| <i>BPIFB2</i>                                                           | Upregulated |
| <i>HS3ST3A1</i>                                                         | Upregulated |
| <i>SRPX2</i>                                                            | Upregulated |
| <i>ELFN2</i>                                                            | Upregulated |
| <i>LOC344887</i>                                                        | Upregulated |
| <i>LOC102724094</i>                                                     | Upregulated |
| <i>ME1</i>                                                              | Upregulated |
| <i>SCG3</i>                                                             | Upregulated |

**Table S1** (continued)

**Table S1** (continued)

| Commonly differentially expressed among GSE10006, GSE11784 AND GSE20257 |             |
|-------------------------------------------------------------------------|-------------|
| <i>PHEX</i>                                                             | Upregulated |
| <i>CBR1</i>                                                             | Upregulated |
| <i>STATH</i>                                                            | Upregulated |
| <i>SPRR1B</i>                                                           | Upregulated |
| <i>CYP4F11</i>                                                          | Upregulated |
| <i>PTPRH</i>                                                            | Upregulated |
| <i>EGF</i>                                                              | Upregulated |
| <i>DUOX2</i>                                                            | Upregulated |
| <i>MUC5AC</i>                                                           | Upregulated |
| <i>SCEL</i>                                                             | Upregulated |
| <i>HOXA1</i>                                                            | Upregulated |
| <i>NR0B1</i>                                                            | Upregulated |
| <i>LRR31</i>                                                            | Upregulated |
| <i>AKR1C3</i>                                                           | Upregulated |
| <i>CNGB1</i>                                                            | Upregulated |
| <i>CYP4F2</i>                                                           | Upregulated |
| <i>RP11-619L19.1</i>                                                    | Upregulated |
| <i>BMP4</i>                                                             | Upregulated |
| <i>MMP12</i>                                                            | Upregulated |
| <i>RP11-203B7.1</i>                                                     | Upregulated |
| <i>ENAM</i>                                                             | Upregulated |
| <i>CYP4F3</i>                                                           | Upregulated |
| <i>TREM2</i>                                                            | Upregulated |
| <i>CLDN10</i>                                                           | Upregulated |
| <i>NQO1</i>                                                             | Upregulated |
| <i>CTCFL</i>                                                            | Upregulated |
| <i>FCGR2B</i>                                                           | Upregulated |
| <i>DEFB1</i>                                                            | Upregulated |
| <i>UPK1B</i>                                                            | Upregulated |
| <i>RP11-524D16__A.3</i>                                                 | Upregulated |
| <i>PIR</i>                                                              | Upregulated |
| <i>PHLDA1</i>                                                           | Upregulated |
| <i>CBR3</i>                                                             | Upregulated |
| <i>BPIFA2</i>                                                           | Upregulated |
| <i>AKR1C1</i>                                                           | Upregulated |
| <i>C22orf42</i>                                                         | Upregulated |
| <i>ADM</i>                                                              | Upregulated |
| <i>SRXN1</i>                                                            | Upregulated |
| <i>mir-223</i>                                                          | Upregulated |
| <i>IL19</i>                                                             | Upregulated |

**Table S1** (continued)

**Table S1** (continued)Commonly differentially expressed among GSE10006,  
GSE11784 AND GSE20257

|                      |             |
|----------------------|-------------|
| <i>DNAJC12</i>       | Upregulated |
| <i>SIX3</i>          | Upregulated |
| <i>PANX3</i>         | Upregulated |
| <i>CALCA</i>         | Upregulated |
| <i>RP13-238F13.5</i> | Upregulated |
| <i>KRT40</i>         | Upregulated |
| <i>CDH2</i>          | Upregulated |
| <i>CLIP4</i>         | Upregulated |
| <i>CCL7</i>          | Upregulated |
| <i>PLA2G7</i>        | Upregulated |
| <i>ASCL3</i>         | Upregulated |
| <i>REG3G</i>         | Upregulated |
| <i>OSGIN1</i>        | Upregulated |
| <i>HTR2B</i>         | Upregulated |
| <i>FAM3B</i>         | Upregulated |
| <i>SIGLEC11</i>      | Upregulated |
| <i>TXNRD1</i>        | Upregulated |
| <i>TMPRSS11E</i>     | Upregulated |
| <i>SAMD5</i>         | Upregulated |
| <i>PRSS50</i>        | Upregulated |
| <i>BCL2A1</i>        | Upregulated |
| <i>ATP6V0A4</i>      | Upregulated |
| <i>CEMIP</i>         | Upregulated |
| <i>LHX6</i>          | Upregulated |
| <i>AGPAT9</i>        | Upregulated |
| <i>BAALC</i>         | Upregulated |
| <i>GFRA3</i>         | Upregulated |
| <i>LOXHD1</i>        | Upregulated |
| <i>PLAT</i>          | Upregulated |
| <i>RP11-96H17.1</i>  | Upregulated |
| <i>LINC00403</i>     | Upregulated |
| <i>AKR1B1</i>        | Upregulated |
| <i>ITGAX</i>         | Upregulated |
| <i>FCN1</i>          | Upregulated |
| <i>MCEMP1</i>        | Upregulated |
| <i>OSTM1-AS1</i>     | Upregulated |
| <i>C2orf70</i>       | Upregulated |
| <i>HGD</i>           | Upregulated |
| <i>TMCC3</i>         | Upregulated |
| <i>ATXN8OS</i>       | Upregulated |

**Table S1** (continued)**Table S1** (continued)Commonly differentially expressed among GSE10006,  
GSE11784 AND GSE20257

|                      |               |
|----------------------|---------------|
| <i>MRC1</i>          | Upregulated   |
| <i>PSG7</i>          | Upregulated   |
| <i>LOC101929591</i>  | Upregulated   |
| <i>DUSP5P1</i>       | Upregulated   |
| <i>HTATIP2</i>       | Upregulated   |
| <i>CLMP</i>          | Upregulated   |
| <i>MMP19</i>         | Upregulated   |
| <i>FOXD3-AS1</i>     | Upregulated   |
| <i>TKT</i>           | Upregulated   |
| <i>RNFT2</i>         | Upregulated   |
| <i>WDR72</i>         | Upregulated   |
| <i>SPINK5</i>        | Upregulated   |
| <i>NAV1</i>          | Upregulated   |
| <i>AZGP1</i>         | Upregulated   |
| <i>FAM20C</i>        | Upregulated   |
| <i>ADRB3</i>         | Upregulated   |
| <i>MTHFD2</i>        | Upregulated   |
| <i>CHST1</i>         | Upregulated   |
| <i>RP11-400N13.1</i> | Upregulated   |
| <i>OR8D2</i>         | Upregulated   |
| <i>CD163L1</i>       | Upregulated   |
| <i>CD109</i>         | Upregulated   |
| <i>SMOC1</i>         | Upregulated   |
| <i>EPHB1</i>         | Upregulated   |
| <i>CPE</i>           | Upregulated   |
| <i>ATP8B5P</i>       | Upregulated   |
| <i>CACNA2D3</i>      | Upregulated   |
| <i>PTPRG-AS1</i>     | Upregulated   |
| <i>SLC2A3</i>        | Upregulated   |
| <i>LOC101927690</i>  | Upregulated   |
| <i>LOC285423</i>     | Upregulated   |
| <i>MLKL</i>          | Upregulated   |
| <i>LYPD3</i>         | Upregulated   |
| <i>CTHRC1</i>        | Upregulated   |
| <i>TUBB2B</i>        | Upregulated   |
| <i>ITLN1</i>         | Downregulated |
| <i>NAV3</i>          | Downregulated |
| <i>TACR1</i>         | Downregulated |
| <i>LTF</i>           | Downregulated |
| <i>MT1M</i>          | Downregulated |

**Table S1** (continued)

**Table S1** (*continued*)Commonly differentially expressed among GSE10006,  
GSE11784 AND GSE20257

|                     |               |
|---------------------|---------------|
| <i>SEC14L3</i>      | Downregulated |
| <i>C3</i>           | Downregulated |
| <i>TFPI2</i>        | Downregulated |
| <i>HSD17B2</i>      | Downregulated |
| <i>LOC100130744</i> | Downregulated |
| <i>PPP1R16B</i>     | Downregulated |
| <i>KCNA1</i>        | Downregulated |
| <i>TMEM45A</i>      | Downregulated |
| <i>CX3CL1</i>       | Downregulated |
| <i>CDKAL1</i>       | Downregulated |
| <i>MAOB</i>         | Downregulated |
| <i>NT5E</i>         | Downregulated |
| <i>ZSCAN4</i>       | Downregulated |
| <i>FAM65C</i>       | Downregulated |
| <i>LOC338667</i>    | Downregulated |
| <i>LOC100505874</i> | Downregulated |
| <i>AFAP1L1</i>      | Downregulated |
| <i>NPAS3</i>        | Downregulated |
| <i>WNK4</i>         | Downregulated |
| <i>CNN3</i>         | Downregulated |
| <i>SHISA9</i>       | Downregulated |
| <i>RTN4RL1</i>      | Downregulated |
| <i>AVPR1A</i>       | Downregulated |
| <i>LOC283177</i>    | Downregulated |
| <i>C8orf12</i>      | Downregulated |
| <i>PLK2</i>         | Downregulated |
| <i>ITM2A</i>        | Downregulated |
| <i>MUC5B</i>        | Downregulated |
| <i>SLIT2</i>        | Downregulated |
| <i>FHOD3</i>        | Downregulated |
| <i>FOXA2</i>        | Downregulated |
| <i>SERPINB10</i>    | Downregulated |
| <i>LOC100507560</i> | Downregulated |
| <i>PNMA2</i>        | Downregulated |
| <i>C1QTNF4</i>      | Downregulated |
| <i>CES1P1</i>       | Downregulated |
| <i>ANO4</i>         | Downregulated |
| <i>CCL20</i>        | Downregulated |
| <i>SLC29A1</i>      | Downregulated |
| <i>PCSK6</i>        | Downregulated |

**Table S1** (*continued*)**Table S1** (*continued*)Commonly differentially expressed among GSE10006,  
GSE11784 AND GSE20257

|                      |               |
|----------------------|---------------|
| <i>PWAR5</i>         | Downregulated |
| <i>THSD7A</i>        | Downregulated |
| <i>TMEM178A</i>      | Downregulated |
| <i>PROS1</i>         | Downregulated |
| <i>GRM5</i>          | Downregulated |
| <i>RP11-355F16.1</i> | Downregulated |
| <i>TPM2</i>          | Downregulated |
| <i>SMIM1</i>         | Downregulated |
| <i>CSGALNACT1</i>    | Downregulated |
| <i>CYP4X1</i>        | Downregulated |
| <i>PANK1</i>         | Downregulated |
| <i>PCDH17</i>        | Downregulated |
| <i>PYGO1</i>         | Downregulated |
| <i>PRKAR2B</i>       | Downregulated |
| <i>LAG3</i>          | Downregulated |
| <i>ITGB2-AS1</i>     | Downregulated |
| <i>PAX1</i>          | Downregulated |
| <i>ZBTB16</i>        | Downregulated |
| <i>VGLL3</i>         | Downregulated |
| <i>SGCE</i>          | Downregulated |
| <i>MGP</i>           | Downregulated |
| <i>MMP7</i>          | Downregulated |

**Table S2** Ferroptosis genes

| FERROPTOSIS GENES |
|-------------------|
| SLC7A11           |
| GPX4              |
| AKR1C1            |
| AKR1C2            |
| AKR1C3            |
| RB1               |
| HSPB1             |
| HSF1              |
| NFE2L2            |
| SQSTM1            |
| NQO1              |
| HMOX1             |
| FTH1              |
| MUC1              |
| MT1G              |
| SLC40A1           |
| CISD1             |
| HSPA5             |
| ATF4              |
| TP53              |
| HELLS             |
| SCD               |
| FADS2             |
| SRC               |
| STAT3             |
| PML               |
| NFS1              |
| TP63              |
| CDKN1A            |
| MIR137            |
| VDAC2             |
| FH                |
| CISD2             |
| MIR9-1            |
| MIR9-2            |

*Table S2 (continued)***Table S2** (continued)

| FERROPTOSIS GENES |
|-------------------|
| MIR9-3            |
| CBS               |
| ISCU              |
| ACSL3             |
| OTUB1             |
| CD44              |
| LINC00336         |
| BRD4              |
| PRDX6             |
| MIR17             |
| SESN2             |
| NF2               |
| ARNTL             |
| HIF1A             |
| JUN               |
| CA9               |
| TMBIM4            |
| PLIN2             |
| AIFM2             |
| LAMP2             |
| ZFP36             |
| PROM2             |
| CHMP5             |
| CHMP6             |
| CAV1              |
| GCH1              |
| PTGS2             |
| DUSP1             |
| NOS2              |
| NCF2              |
| MT3               |
| UBC               |
| ALB               |
| TXNRD1            |
| SRXN1             |

*Table S2 (continued)***Table S2** (continued)

| FERROPTOSIS GENES |
|-------------------|
| GPX2              |
| BNIP3             |
| OXSRI             |
| SELENOS           |
| ANGPTL7           |
| CHAC1             |
| DDIT4             |
| LOC284561         |
| ASNS              |
| TSC22D3           |
| DDIT3             |
| JDP2              |
| SLC1A4            |
| PCK2              |
| TXNIP             |
| VLDLR             |
| GPT2              |
| PSAT1             |
| LURAP1L           |
| SLC7A5            |
| HERPUD1           |
| XBP1              |
| ATF3              |
| SLC3A2            |
| ZNF419            |
| KLHL24            |
| TRIB3             |
| ZFP69B            |
| ATP6V1G2          |
| VEGFA             |
| GDF15             |
| TUBE1             |
| ARRDC3            |
| CEBPG             |
| SNORA16A          |

*Table S2 (continued)***Table S2** (continued)

| FERROPTOSIS GENES |
|-------------------|
| RGS4              |
| BLOC1S5-TXNDC5    |
| LOC390705         |
| EIF2S1            |
| HSD17B11          |
| AGPAT3            |
| SETD1B            |
| TF                |
| FTL               |
| RPL8              |
| ATP5MC3           |
| TFRC              |
| MAFG              |
| DRD5              |
| DRD4              |
| MAP3K5            |
| MAPK14            |
| SLC2A1            |
| SLC2A3            |
| SLC2A6            |
| SLC2A8            |
| SLC2A12           |
| GLUT13            |
| SLC2A14           |
| EIF2AK4           |
| ALOX5             |
| ALOX12            |
| ALOX15            |
| HMGB1             |
| ELAVL1            |
| HBA1              |
| NNMT              |
| PLIN4             |
| HIC1              |
| STMN1             |

*Table S2 (continued)*

**Table S2** (*continued*)

---

| FERROPTOSIS GENES |
|-------------------|
| RRM2              |
| CAPG              |
| HNF4A             |
| NGB               |
| YWHAE             |
| GABPB1            |
| AURKA             |
| MIR4715           |
| RIPK1             |
| PRDX1             |
| MIR30B            |
| IREB2             |
| CS                |
| EMC2              |
| ACSF2             |
| NOX1              |
| CYBB              |
| NOX3              |
| NOX4              |
| NOX5              |
| DUOX1             |
| DUOX2             |
| G6PD              |
| PGD               |
| ACSL4             |
| LPCAT3            |
| NRAS              |
| KRAS              |
| HRAS              |
| CARS1             |
| KEAP1             |
| ATG5              |
| ATG7              |
| NCOA4             |
| ALOX12B           |

---

**Table S2** (*continued*)**Table S2** (*continued*)

---

| FERROPTOSIS GENES |
|-------------------|
| ALOX15B           |
| ALOXE3            |
| PHKG2             |
| SAT1              |
| EGFR              |
| MAPK3             |
| MAPK1             |
| ZEB1              |
| DPP4              |
| CDKN2A            |
| PEBP1             |
| SOCS1             |
| CDO1              |
| MYB               |
| SLC1A5            |
| LINC00472         |
| GOT1              |
| BECN1             |
| PRKAA2            |
| PRKAA1            |
| BAP1              |
| ABCC1             |
| MIR6852           |
| ACVR1B            |
| TGFBR1            |
| IFNG              |
| ANO6              |
| TNFAIP3           |
| ATM               |
| YY1AP1            |
| EGLN2             |
| MIOX              |
| TAZ               |
| MTDH              |
| IDH1              |

---

**Table S2** (*continued*)**Table S2** (*continued*)

---

| FERROPTOSIS GENES |
|-------------------|
| FBXW7             |
| PANX1             |
| DNAJB6            |
| LONP1             |

---

**Table S3** mRNA-miRNA pairs

| ID                | Target | TargetID |
|-------------------|--------|----------|
| hsa-let-7e-5p     | TXNRD1 | 7296     |
| hsa-mir-26b-5p    | TXNRD1 | 7296     |
| hsa-mir-34a-5p    | TXNRD1 | 7296     |
| hsa-mir-186-5p    | TXNRD1 | 7296     |
| hsa-mir-155-5p    | TXNRD1 | 7296     |
| hsa-mir-409-3p    | TXNRD1 | 7296     |
| hsa-mir-504-5p    | TXNRD1 | 7296     |
| hsa-mir-505-3p    | TXNRD1 | 7296     |
| hsa-mir-421       | TXNRD1 | 7296     |
| hsa-mir-124-5p    | TXNRD1 | 7296     |
| hsa-mir-1323      | TXNRD1 | 7296     |
| hsa-mir-1298-5p   | TXNRD1 | 7296     |
| hsa-mir-1206      | TXNRD1 | 7296     |
| hsa-mir-1257      | TXNRD1 | 7296     |
| hsa-mir-548o-3p   | TXNRD1 | 7296     |
| hsa-mir-4272      | TXNRD1 | 7296     |
| hsa-mir-3611      | TXNRD1 | 7296     |
| hsa-mir-219b-5p   | TXNRD1 | 7296     |
| hsa-mir-4672      | TXNRD1 | 7296     |
| hsa-mir-4709-5p   | TXNRD1 | 7296     |
| hsa-mir-4714-3p   | TXNRD1 | 7296     |
| hsa-mir-5587-5p   | TXNRD1 | 7296     |
| hsa-mir-6768-5p   | TXNRD1 | 7296     |
| hsa-mir-6853-3p   | TXNRD1 | 7296     |
| hsa-mir-7159-5p   | TXNRD1 | 7296     |
| hsa-mir-1243      | TXNRD1 | 7296     |
| hsa-mir-124-3p    | TXNRD1 | 7296     |
| hsa-mir-125a-5p   | TXNRD1 | 7296     |
| hsa-mir-125b-5p   | TXNRD1 | 7296     |
| hsa-mir-130b-5p   | TXNRD1 | 7296     |
| hsa-mir-141-3p    | TXNRD1 | 7296     |
| hsa-mir-148a-3p   | TXNRD1 | 7296     |
| hsa-mir-148b-3p   | TXNRD1 | 7296     |
| hsa-mir-149-5p    | TXNRD1 | 7296     |
| hsa-mir-15b-3p    | TXNRD1 | 7296     |
| hsa-mir-16-5p     | TXNRD1 | 7296     |
| hsa-mir-181a-2-3p | TXNRD1 | 7296     |
| hsa-mir-1825      | TXNRD1 | 7296     |
| hsa-mir-182-5p    | TXNRD1 | 7296     |

**Table S3** (continued)**Table S3** (continued)

| ID              | Target | TargetID |
|-----------------|--------|----------|
| hsa-mir-191-5p  | TXNRD1 | 7296     |
| hsa-mir-193a-3p | TXNRD1 | 7296     |
| hsa-mir-193b-3p | TXNRD1 | 7296     |
| hsa-mir-196a-5p | TXNRD1 | 7296     |
| hsa-mir-203a-3p | TXNRD1 | 7296     |
| hsa-mir-21-3p   | TXNRD1 | 7296     |
| hsa-mir-224-5p  | TXNRD1 | 7296     |
| hsa-mir-22-5p   | TXNRD1 | 7296     |
| hsa-mir-23a-3p  | TXNRD1 | 7296     |
| hsa-mir-23b-3p  | TXNRD1 | 7296     |
| hsa-mir-24-1-5p | TXNRD1 | 7296     |
| hsa-mir-24-2-5p | TXNRD1 | 7296     |
| hsa-mir-24-3p   | TXNRD1 | 7296     |
| hsa-mir-25-3p   | TXNRD1 | 7296     |
| hsa-mir-26a-5p  | TXNRD1 | 7296     |
| hsa-mir-27a-5p  | TXNRD1 | 7296     |
| hsa-mir-29a-3p  | TXNRD1 | 7296     |
| hsa-mir-29b-3p  | TXNRD1 | 7296     |
| hsa-mir-29c-3p  | TXNRD1 | 7296     |
| hsa-mir-330-3p  | TXNRD1 | 7296     |
| hsa-mir-331-5p  | TXNRD1 | 7296     |
| hsa-mir-338-3p  | TXNRD1 | 7296     |
| hsa-mir-339-3p  | TXNRD1 | 7296     |
| hsa-mir-374c-5p | TXNRD1 | 7296     |
| hsa-mir-376c-3p | TXNRD1 | 7296     |
| hsa-mir-425-5p  | TXNRD1 | 7296     |
| hsa-mir-4422    | TXNRD1 | 7296     |
| hsa-mir-455-3p  | TXNRD1 | 7296     |
| hsa-mir-4766-3p | TXNRD1 | 7296     |
| hsa-mir-500a-3p | TXNRD1 | 7296     |
| hsa-mir-502-3p  | TXNRD1 | 7296     |
| hsa-mir-505-5p  | TXNRD1 | 7296     |
| hsa-mir-518a-5p | TXNRD1 | 7296     |
| hsa-mir-522-5p  | TXNRD1 | 7296     |
| hsa-mir-527     | TXNRD1 | 7296     |
| hsa-mir-545-3p  | TXNRD1 | 7296     |
| hsa-mir-548n    | TXNRD1 | 7296     |
| hsa-mir-551b-5p | TXNRD1 | 7296     |
| hsa-mir-575     | TXNRD1 | 7296     |

**Table S3** (continued)

**Table S3** (continued)

| ID              | Target  | TargetID |
|-----------------|---------|----------|
| hsa-mir-587     | TXNRD1  | 7296     |
| hsa-mir-590-3p  | TXNRD1  | 7296     |
| hsa-mir-624-3p  | TXNRD1  | 7296     |
| hsa-mir-634     | TXNRD1  | 7296     |
| hsa-mir-7-1-3p  | TXNRD1  | 7296     |
| hsa-mir-7-2-3p  | TXNRD1  | 7296     |
| hsa-mir-935     | TXNRD1  | 7296     |
| hsa-mir-942-5p  | TXNRD1  | 7296     |
| hsa-mir-1-3p    | TXNRD1  | 7296     |
| hsa-mir-138-5p  | TXNRD1  | 7296     |
| hsa-mir-200b-3p | TXNRD1  | 7296     |
| hsa-mir-423-5p  | TXNRD1  | 7296     |
| hsa-mir-374a-5p | TXNRD1  | 7296     |
| hsa-mir-96-5p   | SRXN1   | 140809   |
| hsa-mir-1-3p    | SRXN1   | 140809   |
| hsa-mir-200a-5p | SRXN1   | 140809   |
| hsa-mir-505-3p  | SRXN1   | 140809   |
| hsa-mir-600     | SRXN1   | 140809   |
| hsa-mir-200b-5p | SRXN1   | 140809   |
| hsa-mir-150-3p  | SRXN1   | 140809   |
| hsa-mir-499a-3p | SRXN1   | 140809   |
| hsa-mir-3974    | SRXN1   | 140809   |
| hsa-mir-499b-3p | SRXN1   | 140809   |
| hsa-mir-5579-5p | SRXN1   | 140809   |
| hsa-mir-6814-5p | SRXN1   | 140809   |
| hsa-mir-6849-3p | SRXN1   | 140809   |
| hsa-mir-7153-3p | SRXN1   | 140809   |
| hsa-mir-103a-3p | SRXN1   | 140809   |
| hsa-mir-155-5p  | SRXN1   | 140809   |
| hsa-mir-191-5p  | SRXN1   | 140809   |
| hsa-mir-10b-5p  | SRXN1   | 140809   |
| hsa-mir-124-3p  | SRXN1   | 140809   |
| hsa-mir-146a-5p | SRXN1   | 140809   |
| hsa-mir-195-5p  | SRXN1   | 140809   |
| hsa-mir-34a-5p  | SRXN1   | 140809   |
| hsa-mir-7-5p    | SRXN1   | 140809   |
| hsa-mir-374a-5p | SRXN1   | 140809   |
| hsa-mir-1       | SRXN1   | 140809   |
| hsa-mir-17-5p   | SLC7A11 | 23657    |
| hsa-mir-19a-3p  | SLC7A11 | 23657    |

**Table S3** (continued)

**Table S3** (continued)

| ID              | Target  | TargetID |
|-----------------|---------|----------|
| hsa-mir-19b-3p  | SLC7A11 | 23657    |
| hsa-mir-20a-5p  | SLC7A11 | 23657    |
| hsa-mir-25-3p   | SLC7A11 | 23657    |
| hsa-mir-26b-5p  | SLC7A11 | 23657    |
| hsa-mir-27a-3p  | SLC7A11 | 23657    |
| hsa-mir-30a-5p  | SLC7A11 | 23657    |
| hsa-mir-32-5p   | SLC7A11 | 23657    |
| hsa-mir-92a-3p  | SLC7A11 | 23657    |
| hsa-mir-93-5p   | SLC7A11 | 23657    |
| hsa-mir-106a-5p | SLC7A11 | 23657    |
| hsa-mir-192-5p  | SLC7A11 | 23657    |
| hsa-mir-181a-5p | SLC7A11 | 23657    |
| hsa-mir-215-5p  | SLC7A11 | 23657    |
| hsa-mir-218-5p  | SLC7A11 | 23657    |
| hsa-mir-122-5p  | SLC7A11 | 23657    |
| hsa-mir-128-3p  | SLC7A11 | 23657    |
| hsa-mir-142-3p  | SLC7A11 | 23657    |
| hsa-mir-150-5p  | SLC7A11 | 23657    |
| hsa-mir-155-5p  | SLC7A11 | 23657    |
| hsa-mir-106b-5p | SLC7A11 | 23657    |
| hsa-mir-302a-3p | SLC7A11 | 23657    |
| hsa-mir-363-3p  | SLC7A11 | 23657    |
| hsa-mir-302b-3p | SLC7A11 | 23657    |
| hsa-mir-302c-3p | SLC7A11 | 23657    |
| hsa-mir-302d-3p | SLC7A11 | 23657    |
| hsa-mir-367-3p  | SLC7A11 | 23657    |
| hsa-mir-372-3p  | SLC7A11 | 23657    |
| hsa-mir-373-3p  | SLC7A11 | 23657    |
| hsa-mir-148b-3p | SLC7A11 | 23657    |
| hsa-mir-20b-5p  | SLC7A11 | 23657    |
| hsa-mir-329-3p  | SLC7A11 | 23657    |
| hsa-mir-410-3p  | SLC7A11 | 23657    |
| hsa-mir-489-3p  | SLC7A11 | 23657    |
| hsa-mir-512-3p  | SLC7A11 | 23657    |
| hsa-mir-498     | SLC7A11 | 23657    |
| hsa-mir-520e    | SLC7A11 | 23657    |
| hsa-mir-520a-3p | SLC7A11 | 23657    |
| hsa-mir-526b-3p | SLC7A11 | 23657    |
| hsa-mir-520b    | SLC7A11 | 23657    |
| hsa-mir-520c-3p | SLC7A11 | 23657    |

**Table S3** (continued)

**Table S3** (continued)

| ID              | Target  | TargetID |
|-----------------|---------|----------|
| hsa-mir-519d-3p | SLC7A11 | 23657    |
| hsa-mir-520d-3p | SLC7A11 | 23657    |
| hsa-mir-520g-3p | SLC7A11 | 23657    |
| hsa-mir-520h    | SLC7A11 | 23657    |
| hsa-mir-500a-3p | SLC7A11 | 23657    |
| hsa-mir-92b-3p  | SLC7A11 | 23657    |
| hsa-mir-587     | SLC7A11 | 23657    |
| hsa-mir-595     | SLC7A11 | 23657    |
| hsa-mir-603     | SLC7A11 | 23657    |
| hsa-mir-767-5p  | SLC7A11 | 23657    |
| hsa-mir-223-5p  | SLC7A11 | 23657    |
| hsa-mir-186-3p  | SLC7A11 | 23657    |
| hsa-mir-362-3p  | SLC7A11 | 23657    |
| hsa-mir-340-5p  | SLC7A11 | 23657    |
| hsa-mir-505-5p  | SLC7A11 | 23657    |
| hsa-mir-574-5p  | SLC7A11 | 23657    |
| hsa-mir-302e    | SLC7A11 | 23657    |
| hsa-mir-1279    | SLC7A11 | 23657    |
| hsa-mir-1281    | SLC7A11 | 23657    |
| hsa-mir-1976    | SLC7A11 | 23657    |
| hsa-mir-548t-5p | SLC7A11 | 23657    |
| hsa-mir-3163    | SLC7A11 | 23657    |
| hsa-mir-4279    | SLC7A11 | 23657    |
| hsa-mir-4282    | SLC7A11 | 23657    |
| hsa-mir-3941    | SLC7A11 | 23657    |
| hsa-mir-4532    | SLC7A11 | 23657    |
| hsa-mir-3913-3p | SLC7A11 | 23657    |
| hsa-mir-4640-3p | SLC7A11 | 23657    |
| hsa-mir-4722-3p | SLC7A11 | 23657    |
| hsa-mir-4731-5p | SLC7A11 | 23657    |
| hsa-mir-4789-5p | SLC7A11 | 23657    |
| hsa-mir-4789-3p | SLC7A11 | 23657    |
| hsa-mir-5011-5p | SLC7A11 | 23657    |
| hsa-mir-5089-5p | SLC7A11 | 23657    |
| hsa-mir-5193    | SLC7A11 | 23657    |
| hsa-mir-5571-5p | SLC7A11 | 23657    |
| hsa-mir-5589-5p | SLC7A11 | 23657    |
| hsa-mir-5589-3p | SLC7A11 | 23657    |
| hsa-mir-5683    | SLC7A11 | 23657    |
| hsa-mir-1247-3p | SLC7A11 | 23657    |

**Table S3** (continued)**Table S3** (continued)

| ID               | Target  | TargetID |
|------------------|---------|----------|
| hsa-mir-1277-5p  | SLC7A11 | 23657    |
| hsa-mir-548az-5p | SLC7A11 | 23657    |
| hsa-mir-6504-3p  | SLC7A11 | 23657    |
| hsa-mir-6506-5p  | SLC7A11 | 23657    |
| hsa-mir-190a-3p  | SLC7A11 | 23657    |
| hsa-mir-619-5p   | SLC7A11 | 23657    |
| hsa-mir-548e-5p  | SLC7A11 | 23657    |
| hsa-mir-6727-3p  | SLC7A11 | 23657    |
| hsa-mir-6747-3p  | SLC7A11 | 23657    |
| hsa-mir-6778-3p  | SLC7A11 | 23657    |
| hsa-mir-6791-3p  | SLC7A11 | 23657    |
| hsa-mir-6826-5p  | SLC7A11 | 23657    |
| hsa-mir-6829-3p  | SLC7A11 | 23657    |
| hsa-mir-6835-3p  | SLC7A11 | 23657    |
| hsa-mir-6867-5p  | SLC7A11 | 23657    |
| hsa-mir-6874-5p  | SLC7A11 | 23657    |
| hsa-mir-1-5p     | SLC7A11 | 23657    |
| hsa-mir-3653-5p  | SLC7A11 | 23657    |
| hsa-mir-8485     | SLC7A11 | 23657    |
| hsa-let-7g-3p    | SLC7A11 | 23657    |
| hsa-mir-100-5p   | SLC7A11 | 23657    |
| hsa-mir-130a-3p  | SLC7A11 | 23657    |
| hsa-mir-130b-3p  | SLC7A11 | 23657    |
| hsa-mir-138-2-3p | SLC7A11 | 23657    |
| hsa-mir-148a-5p  | SLC7A11 | 23657    |
| hsa-mir-17-3p    | SLC7A11 | 23657    |
| hsa-mir-181b-5p  | SLC7A11 | 23657    |
| hsa-mir-181c-5p  | SLC7A11 | 23657    |
| hsa-mir-181d-5p  | SLC7A11 | 23657    |
| hsa-mir-183-3p   | SLC7A11 | 23657    |
| hsa-mir-191-5p   | SLC7A11 | 23657    |
| hsa-mir-196a-5p  | SLC7A11 | 23657    |
| hsa-mir-196b-5p  | SLC7A11 | 23657    |
| hsa-mir-197-5p   | SLC7A11 | 23657    |
| hsa-mir-199a-3p  | SLC7A11 | 23657    |
| hsa-mir-199b-3p  | SLC7A11 | 23657    |
| hsa-mir-20a-3p   | SLC7A11 | 23657    |
| hsa-mir-217      | SLC7A11 | 23657    |
| hsa-mir-221-3p   | SLC7A11 | 23657    |
| hsa-mir-222-5p   | SLC7A11 | 23657    |

**Table S3** (continued)



Table S3 (continued)

| ID               | Target  | TargetID |
|------------------|---------|----------|
| hsa-mir-26a-5p   | SLC7A11 | 23657    |
| hsa-mir-27b-3p   | SLC7A11 | 23657    |
| hsa-mir-301a-3p  | SLC7A11 | 23657    |
| hsa-mir-301b-3p  | SLC7A11 | 23657    |
| hsa-mir-30b-5p   | SLC7A11 | 23657    |
| hsa-mir-30c-5p   | SLC7A11 | 23657    |
| hsa-mir-30d-5p   | SLC7A11 | 23657    |
| hsa-mir-30e-5p   | SLC7A11 | 23657    |
| hsa-mir-3140-3p  | SLC7A11 | 23657    |
| hsa-mir-330-3p   | SLC7A11 | 23657    |
| hsa-mir-331-5p   | SLC7A11 | 23657    |
| hsa-mir-33a-5p   | SLC7A11 | 23657    |
| hsa-mir-34c-3p   | SLC7A11 | 23657    |
| hsa-mir-361-5p   | SLC7A11 | 23657    |
| hsa-mir-362-5p   | SLC7A11 | 23657    |
| hsa-mir-374a-3p  | SLC7A11 | 23657    |
| hsa-mir-374b-5p  | SLC7A11 | 23657    |
| hsa-mir-378g     | SLC7A11 | 23657    |
| hsa-mir-411-3p   | SLC7A11 | 23657    |
| hsa-mir-4317     | SLC7A11 | 23657    |
| hsa-mir-4517     | SLC7A11 | 23657    |
| hsa-mir-4766-3p  | SLC7A11 | 23657    |
| hsa-mir-500a-5p  | SLC7A11 | 23657    |
| hsa-mir-5010-3p  | SLC7A11 | 23657    |
| hsa-mir-501-5p   | SLC7A11 | 23657    |
| hsa-mir-513a-5p  | SLC7A11 | 23657    |
| hsa-mir-542-3p   | SLC7A11 | 23657    |
| hsa-mir-548at-5p | SLC7A11 | 23657    |
| hsa-mir-548b-3p  | SLC7A11 | 23657    |
| hsa-mir-561-3p   | SLC7A11 | 23657    |
| hsa-mir-580-3p   | SLC7A11 | 23657    |
| hsa-mir-622      | SLC7A11 | 23657    |
| hsa-mir-624-5p   | SLC7A11 | 23657    |
| hsa-mir-654-5p   | SLC7A11 | 23657    |
| hsa-mir-935      | SLC7A11 | 23657    |
| hsa-mir-99a-5p   | SLC7A11 | 23657    |
| hsa-mir-1-3p     | SLC7A11 | 23657    |
| hsa-mir-103a-3p  | SLC7A11 | 23657    |
| hsa-mir-124-3p   | SLC7A11 | 23657    |

Table S3 (continued)

Table S3 (continued)

| ID               | Target  | TargetID |
|------------------|---------|----------|
| hsa-mir-494-3p   | SLC7A11 | 23657    |
| hsa-mir-503-5p   | SLC7A11 | 23657    |
| hsa-let-7b-5p    | SLC7A11 | 23657    |
| hsa-mir-10b-5p   | SLC7A11 | 23657    |
| hsa-mir-126-3p   | SLC7A11 | 23657    |
| hsa-mir-129-2-3p | SLC7A11 | 23657    |
| hsa-mir-146a-5p  | SLC7A11 | 23657    |
| hsa-mir-147a     | SLC7A11 | 23657    |
| hsa-mir-182-5p   | SLC7A11 | 23657    |
| hsa-mir-200c-3p  | SLC7A11 | 23657    |
| hsa-mir-203a-3p  | SLC7A11 | 23657    |
| hsa-mir-205-5p   | SLC7A11 | 23657    |
| hsa-mir-214-3p   | SLC7A11 | 23657    |
| hsa-mir-224-5p   | SLC7A11 | 23657    |
| hsa-mir-375      | SLC7A11 | 23657    |
| hsa-mir-376a-5p  | SLC7A11 | 23657    |
| hsa-mir-452-5p   | SLC7A11 | 23657    |
| hsa-mir-671-5p   | SLC7A11 | 23657    |
| hsa-mir-7-5p     | SLC7A11 | 23657    |
| hsa-mir-941      | SLC7A11 | 23657    |
| hsa-mir-101-3p   | SLC7A11 | 23657    |
| hsa-mir-374a-5p  | SLC7A11 | 23657    |
| hsa-mir-122      | SLC7A11 | 23657    |
| hsa-mir-103a-3p  | NQO1    | 1728     |
| hsa-mir-107      | NQO1    | 1728     |
| hsa-mir-186-5p   | NQO1    | 1728     |
| hsa-mir-24-3p    | NQO1    | 1728     |
| hsa-mir-338-5p   | NQO1    | 1728     |
| hsa-mir-34a-5p   | NQO1    | 1728     |
| hsa-mir-375      | NQO1    | 1728     |
| hsa-mir-485-5p   | NQO1    | 1728     |
| hsa-mir-1-3p     | NQO1    | 1728     |
| hsa-mir-124-3p   | NQO1    | 1728     |
| hsa-mir-126-3p   | NQO1    | 1728     |
| hsa-mir-128-3p   | NQO1    | 1728     |
| hsa-mir-129-2-3p | NQO1    | 1728     |
| hsa-mir-147a     | NQO1    | 1728     |
| hsa-mir-200c-3p  | NQO1    | 1728     |
| hsa-mir-205-5p   | NQO1    | 1728     |

Table S3 (continued)

**Table S3** (continued)

| ID               | Target | TargetID |
|------------------|--------|----------|
| hsa-mir-210-3p   | NQO1   | 1728     |
| hsa-mir-27a-3p   | NQO1   | 1728     |
| hsa-mir-7-5p     | NQO1   | 1728     |
| hsa-mir-941      | NQO1   | 1728     |
| hsa-mir-374a-5p  | NQO1   | 1728     |
| hsa-mir-17-3p    | GPX2   | 2877     |
| hsa-mir-335-5p   | GPX2   | 2877     |
| hsa-mir-1343-3p  | GPX2   | 2877     |
| hsa-mir-23b-3p   | GPX2   | 2877     |
| hsa-mir-124-3p   | GPX2   | 2877     |
| hsa-mir-191-5p   | GPX2   | 2877     |
| hsa-mir-210-3p   | GPX2   | 2877     |
| hsa-mir-517a-3p  | GPX2   | 2877     |
| hsa-mir-98-5p    | AKR1C3 | 8644     |
| hsa-mir-155-5p   | AKR1C3 | 8644     |
| hsa-mir-16-2-3p  | AKR1C3 | 8644     |
| hsa-mir-1-3p     | AKR1C3 | 8644     |
| hsa-mir-1343-3p  | AKR1C3 | 8644     |
| hsa-mir-23b-3p   | AKR1C3 | 8644     |
| hsa-mir-10b-5p   | AKR1C3 | 8644     |
| hsa-mir-129-2-3p | AKR1C3 | 8644     |
| hsa-mir-146a-5p  | AKR1C3 | 8644     |
| hsa-mir-15b-3p   | AKR1C3 | 8644     |
| hsa-mir-195-5p   | AKR1C3 | 8644     |
| hsa-mir-200b-3p  | AKR1C3 | 8644     |
| hsa-mir-203a-3p  | AKR1C3 | 8644     |
| hsa-mir-21-3p    | AKR1C3 | 8644     |
| hsa-mir-210-3p   | AKR1C3 | 8644     |
| hsa-mir-212-3p   | AKR1C3 | 8644     |
| hsa-mir-221-3p   | AKR1C3 | 8644     |
| hsa-mir-222-3p   | AKR1C3 | 8644     |
| hsa-mir-26a-5p   | AKR1C3 | 8644     |
| hsa-mir-27a-5p   | AKR1C3 | 8644     |
| hsa-mir-29a-3p   | AKR1C3 | 8644     |
| hsa-mir-29c-3p   | AKR1C3 | 8644     |
| hsa-mir-483-5p   | AKR1C3 | 8644     |
| hsa-mir-374a-5p  | AKR1C3 | 8644     |
| hsa-mir-1-3p     | AKR1C1 | 1645     |
| hsa-mir-155-5p   | AKR1C1 | 1645     |

**Table S3** (continued)**Table S3** (continued)

| ID              | Target | TargetID |
|-----------------|--------|----------|
| hsa-mir-130a-3p | AKR1C1 | 1645     |
| hsa-mir-195-5p  | AKR1C1 | 1645     |
| hsa-mir-27a-3p  | AKR1C1 | 1645     |
| hsa-mir-374a-5p | AKR1C1 | 1645     |
